# Supplementary material
Source: Copernicus journal article supplement (doi:10.5194/egusphere-2026-897)
Supplement: Supplementary file 1 [file egusphere-2026-897-supplement.pdf]

## Supplement

**Table S1:** Low-cost sensor specifications. Superscript 1 indicates the lowest concentration difference that can be distinguished by the sensor while 2 the lowest detectable reading that can be reliably measured and displayed. ISB stands for individual sensor board.

|                                                                        | <b>CO-B41</b>           | <b>NO<sub>2</sub>-B43F</b>       | <b>OX-B431</b>                        | <b>SO<sub>2</sub>-B4</b> |
|------------------------------------------------------------------------|-------------------------|----------------------------------|---------------------------------------|--------------------------|
| <b>Detection range (ppm)</b>                                           | 1000                    | 20                               | 20                                    | 100                      |
| <b>Temperature range (°C)</b>                                          | -30 to 50               | -30 to 40                        | -30 to 40                             | -30 to 50                |
| <b>Relative Humidity Range (%)</b>                                     | 15 to 90                | 15 to 85                         | 15 to 85                              | 15 to 19                 |
| <b>Response time (s)</b>                                               | < 25 (From 0 to 10 ppm) | <60 (From 0 to 2 ppm)            | < 60 (From 0 to 1ppm)                 | < 60 (From 0 to 2ppm)    |
| <b>Resolution<sup>1</sup> ± 2 standard deviation (ppb)</b>             | 4                       | 15                               | 15                                    | 5                        |
| <b>Major cross-sensitivity gases</b>                                   | H <sub>2</sub> S        | O <sub>3</sub> , Cl <sub>2</sub> | NO, NO <sub>2</sub> , Cl <sub>2</sub> | NO, CO, H <sub>2</sub> S |
| <b>Sensitivity<sup>2</sup> from 20 °C to 50 °C / zero current (nA)</b> | -50 to -200             | -10 to 50                        | 5 to 100                              | 10 to 30                 |
| <b>Operation until the loss of 50% of the original signal (months)</b> | >36 (24 warranted)      | >24 (24 warranted)               | >24 (24 warranted)                    | >36 (24 warranted)       |
| <b>Dimensions (mm)</b>                                                 | 32 x 16.5               | 32 x 16.5                        | 32 x 16.5                             | 32 x 16.5                |
| <b>Weight (g)</b>                                                      | <13                     | <13                              | <13                                   | <13                      |
| <b>Cost with ISB (USD)</b>                                             | 153                     | 158                              | 164                                   | 153                      |

5 **Table S2:** Specifications of reference instruments used by Cyprus Department of Labour and Inspection for air quality monitoring.

|                                     | <b>CO</b>                                            | <b>NO<sub>2</sub></b>                                       | <b>O<sub>3</sub></b>             | <b>SO<sub>2</sub></b>                   |
|-------------------------------------|------------------------------------------------------|-------------------------------------------------------------|----------------------------------|-----------------------------------------|
| <b>Model</b>                        | Ecotech Serinus 30                                   | Ecotech Serinus 40                                          | Thermo Scientific 49i            | Ecotech Serinus 50                      |
| <b>ISO_EN Standard</b>              | CYS EN                                               | CYS EN                                                      | CYS EN                           | CYS EN                                  |
| <b>Number</b>                       | 14626:2012                                           | 14211:2012                                                  | 14625:2012                       | 14212:2012                              |
| <b>Method</b>                       | Infrared Spectroscopy                                | Chemiluminescence                                           | Ultraviolet Photometry           | Ultraviolet Fluorescence                |
| <b>Sample flow rate</b>             | 1.0 slpm                                             | 0.3 slpm (0.6 slpm total flow for the NO and NOX flow path) | 1–3 lpm                          | 0.750 slpm                              |
| <b>Precision</b>                    | 20 ppb or 0.1 % of the reading, whichever is greater | 0.4 ppb or 0.5% of the reading, whichever is greater        |                                  | 0.5 ppb or 0.15 % of reading, whichever |
| <b>Response time</b>                | 60 seconds to 95%                                    | 15 seconds to 90%                                           | 20 seconds (10 seconds lag time) | 60 seconds to 95 %                      |
| <b>Lower detectable limit (ppb)</b> | 40                                                   | 0.4                                                         | 1                                | 0.3                                     |

**Table S3:** Optimal values of the main hyper-parameters for SVR, RF, ANN and XGBoost ML algorithms.

| <b>SVR-CO</b>                       | <b>RF-CO</b>                                                 | <b>ANN-CO</b>                                                                                                                                                                                                                                                                                                                                  | <b>XGBoost-CO</b>                                                                                        |
|-------------------------------------|--------------------------------------------------------------|------------------------------------------------------------------------------------------------------------------------------------------------------------------------------------------------------------------------------------------------------------------------------------------------------------------------------------------------|----------------------------------------------------------------------------------------------------------|
| kernel='rbf'<br>C=1<br>$\epsilon=1$ | n_estimators=236<br>max_leaf_nodes=744<br>max_features=0.51  | number of hidden layers=3<br>number of neurons in the 1st and 2nd hidden layers=128<br>number of neurons in the 3rd hidden layer=100<br>activation function in the input and output layers='linear'<br>activation function in the in the hidden layers='ReLU'<br>optimizer='Adam', learning rate=0.01<br>batch size=100 , number of epochs=200 | n_estimators=970<br>max_depth=0<br>eta=0.092<br>subsample=0.76<br>colsample_bytree=1<br>alpha=0.091      |
| <b>SVR-NO<sub>2</sub></b>           | <b>RF-NO<sub>2</sub></b>                                     | <b>ANN-NO<sub>2</sub></b>                                                                                                                                                                                                                                                                                                                      | <b>XGBoost-NO<sub>2</sub></b>                                                                            |
| kernel='rbf'<br>C=1<br>$\epsilon=1$ | n_estimators=194<br>max_leaf_nodes=1564<br>max_features=0.31 | number of hidden layers=3<br>number of neurons in the 1st and 2nd hidden layers=128<br>number of neurons in the 3rd hidden layer=100<br>activation function in the input and output layers='linear'<br>activation function in the in the hidden layers='ReLU'<br>optimizer='Adam', learning rate=0.01<br>batch size=100 , number of epochs=200 | n_estimators=499<br>max_depth=0<br>eta=0.038<br>subsample=0.515<br>colsample_bytree=0.85<br>alpha=0.0017 |
| <b>SVR-O<sub>3</sub></b>            | <b>RF-O<sub>3</sub></b>                                      | <b>ANN-O<sub>3</sub></b>                                                                                                                                                                                                                                                                                                                       | <b>XGBoost-O<sub>3</sub></b>                                                                             |
| kernel='rbf'<br>C=1<br>$\epsilon=1$ | n_estimators=418<br>max_leaf_nodes=1836<br>max_features=0.72 | number of hidden layers=3<br>number of neurons in the 1st and 2nd hidden layers=128<br>number of neurons in the 3rd hidden layer=100<br>activation function in the input and output layers='linear'<br>activation function in the in the hidden layers='ReLU'<br>optimizer='Adam', learning rate=0.01<br>batch size=100 , number of epochs=200 | n_estimators=1260<br>max_depth=0<br>eta=0.099<br>subsample=0.9<br>colsample_bytree=0.38<br>alpha=0.9     |
| <b>SVR-SO<sub>2</sub></b>           | <b>RF-SO<sub>2</sub></b>                                     | <b>ANN-SO<sub>2</sub></b>                                                                                                                                                                                                                                                                                                                      | <b>XGBoost-SO<sub>2</sub></b>                                                                            |
| kernel='rbf'<br>C=1<br>$\epsilon=1$ | n_estimators=474<br>max_leaf_nodes=557<br>max_features=0.32  | number of hidden layers=3<br>number of neurons in the 1st and 2nd hidden layers=128<br>number of neurons in the 3rd hidden layer=100<br>activation function in the input and output layers='linear'<br>activation function in the in the hidden layers='ReLU'<br>optimizer='Adam', learning rate=0.01<br>batch size=100 , number of epochs=200 | n_estimators=924<br>max_depth=0<br>eta=0.024<br>subsample=0.56<br>colsample_bytree=0.89<br>alpha=0.045   |

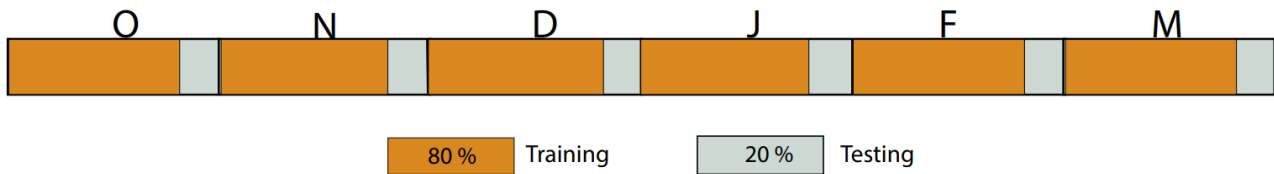

O=October

N=November

D=December

J=January

F=February

M=March

**Figure S1:** Data splitting into training and testing set. The training set was derived from the first 80% of the data of each month, whereas the testing set comprises of the remaining 20% data of each month.
